# Supplementary material for: Luminescence, energy-transfer and tunable color properties of single-component Tb3+ and/or Sm3+ doped NaGd(WO4)2 phosphors with UV excitation for use as WLEDs
Source: Royal Society of Chemistry journal article supplement (doi:10.1039/c4ra12350f), 2014-01-01
Supplement: c4ra12350f1.pdf [file c4ra12350f1.pdf]

## Supporting information

### **Luminescence, energy-transfer and tunable color properties of a single-component $Tb^{3+}$ or/and $Sm^{3+}$ doped $NaGd(WO_4)_2$ phosphors with UV excitation for WLEDs**

Yan Liu, Guixia Liu,\* Xiangting Dong, Jinxian Wang and Wensheng Yu

*Key Laboratory of Applied Chemistry and Nanotechnology at Universities of Jilin Province, Changchun University of Science and Technology, Changchun 130022, China*

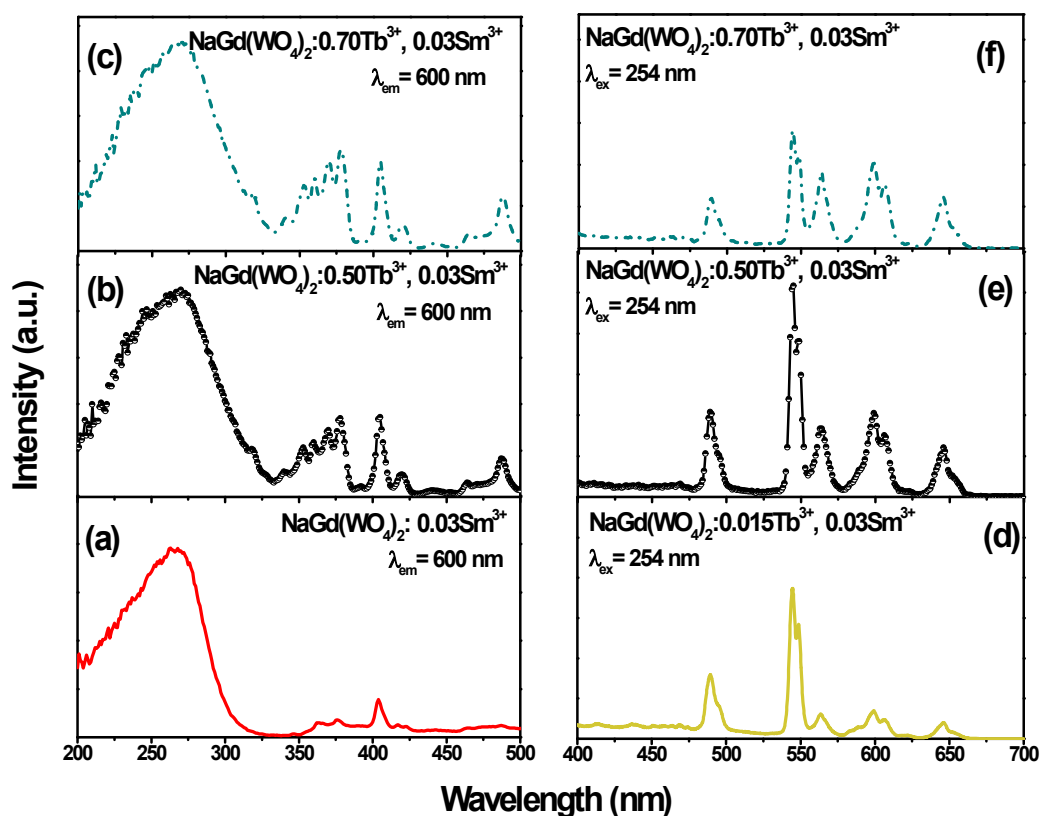

**Fig. S1** PLE spectra of  $NaGd(WO_4)_2: 0.03Sm^{3+}$ (a),  $NaGd(WO_4)_2: 0.50Tb^{3+}, 0.03Sm^{3+}$ (b),  $NaGd(WO_4)_2: 0.70Tb^{3+}, 0.03Sm^{3+}$ (c) phosphors and PL spectra of  $NaGd(WO_4)_2: 0.015Tb^{3+}, 0.03Sm^{3+}$ (d),  $NaGd(WO_4)_2: 0.50Tb^{3+}, 0.03Sm^{3+}$ (e),  $NaGd(WO_4)_2: 0.70Tb^{3+}, 0.03Sm^{3+}$ (f) phosphors .

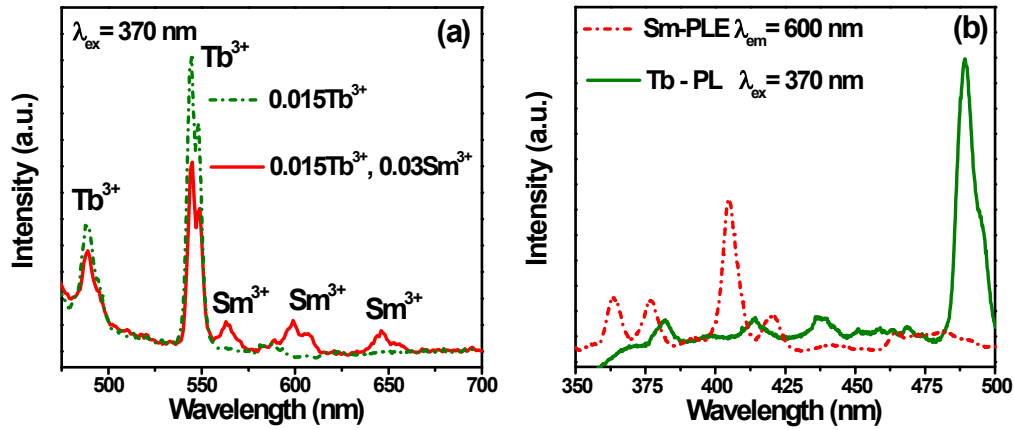

Fig. S2 PL spectra for  $\text{NaGd}(\text{WO}_4)_2: 0.015\text{Tb}^{3+}$  and  $\text{NaGd}(\text{WO}_4)_2: 0.015\text{Tb}^{3+}, 0.03\text{Sm}^{3+}$  (excited at 370 nm)(a); the overlap spectra between the PLE- $\text{NaGd}(\text{WO}_4)_2:\text{Sm}^{3+}$  and PL- $\text{NaGd}(\text{WO}_4)_2:\text{Tb}^{3+}$  samples (b).

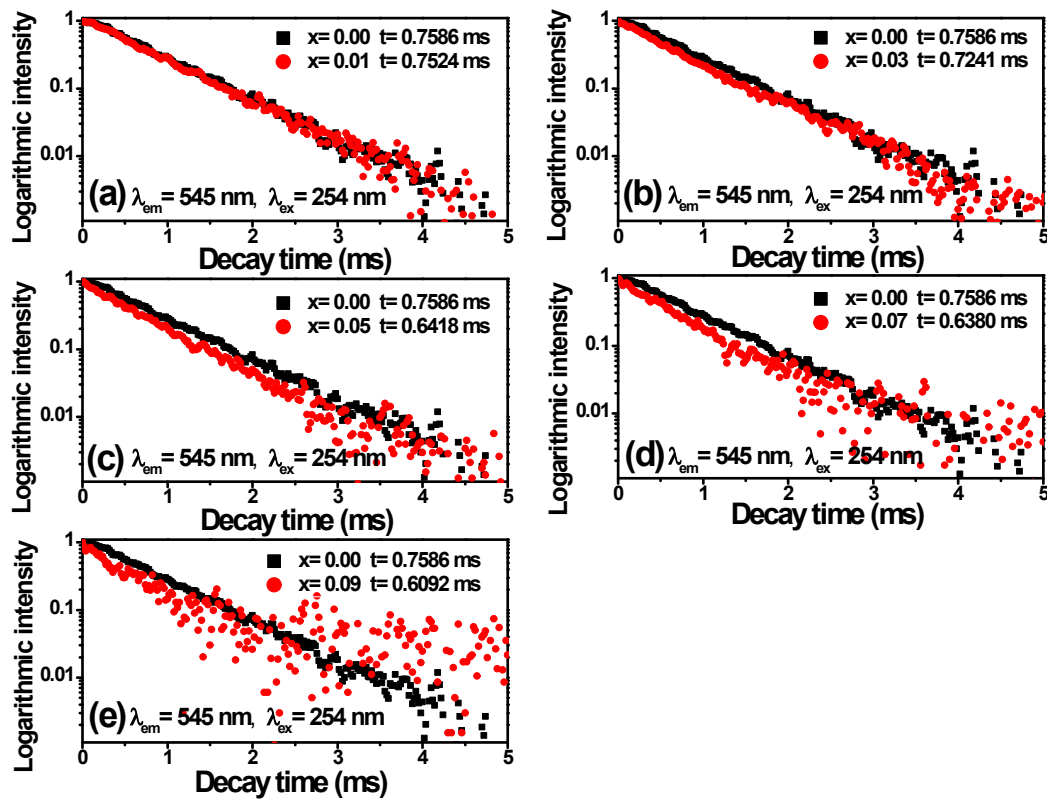

Fig. S3 Decay curves for the luminescence of  $\text{Tb}^{3+}$  ions in  $\text{NaGd}(\text{WO}_4)_2: 0.015\text{Tb}^{3+}, x\text{Sm}^{3+}$  phosphors displayed on a logarithmic intensity (a-e) (excited at 254 nm, monitored at 545 nm).

**Tab. S1** The CIE chromaticity coordinates for NaGd(WO<sub>4</sub>)<sub>2</sub>:Tb<sup>3+</sup>, Sm<sup>3+</sup> phosphors under different wavelengths excitation

| <b>Lab.</b> | <b>Samples</b>   | <b>CIE<sub>1</sub> (x, y)</b><br><b>λ<sub>ex</sub>= 270 nm</b> | <b>CIE<sub>2</sub> (x, y)</b><br><b>λ<sub>ex</sub>= 405 nm</b> |
|-------------|------------------|----------------------------------------------------------------|----------------------------------------------------------------|
| a           | 0.015Sm          | (0.253, 0.223)                                                 | (0.442, 0.309)                                                 |
|             |                  | <b>CIE<sub>3</sub>(x, y)</b><br><b>λ<sub>ex</sub>= 254 nm</b>  | <b>CIE<sub>4</sub> (x, y)</b><br><b>λ<sub>ex</sub>= 361 nm</b> |
| b           | 0.015Tb, 0.005Sm | (0.299, 0.427)                                                 | (0.244, 0.242)                                                 |
| c           | 0.015Tb, 0.01Sm  | (0.349, 0.426)                                                 | --                                                             |
| d           | 0.015Tb, 0.015Sm | (0.365, 0.424)                                                 | (0.274, 0.240)                                                 |
| e           | 0.015Tb, 0.02Sm  | (0.400, 0.421)                                                 | --                                                             |
| f           | 0.015Tb, 0.03Sm  | (0.412, 0.417)                                                 | (0.285, 0.241)                                                 |
| g           | 0.015Tb, 0.05Sm  | (0.432, 0.398)                                                 | (0.294, 0.248)                                                 |
| h           | 0.015Tb, 0.07Sm  | (0.433, 0.388)                                                 | (0.304, 0.257)                                                 |
| i           | 0.015Tb, 0.09Sm  | (0.415, 0.348)                                                 | (0.332, 0.241)                                                 |
| j           | 0.015Tb, 0.15Sm  | (0.394, 0.304)                                                 | --                                                             |
